# Supplementary material for: Charge transfer driven by redox dye molecules on graphene nanosheets for room-temperature gas sensing
Source: Royal Society of Chemistry journal article supplement (doi:10.1039/d1nr04641a), 2021-01-01
Supplement: d1nr04641a11.pdf [file d1nr04641a11.pdf]

## *Supporting Information*

# **Charge Transfer Driven by Redox Dye Molecules on Graphene Nanosheets for Room- Temperature Gas Sensing**

*Wenbo Liu<sup>1,2</sup>, Junwei Zeng<sup>1,2</sup>, Yixun Gao<sup>1,2</sup>, Hao Li<sup>1,2</sup>, Nicolaas Frans de Rooij<sup>2</sup>, Ahmad Umar<sup>3</sup>, Hamed Algarni<sup>4</sup>, Yao Wang<sup>1, 2,\*</sup> and Guofu Zhou<sup>1, 2</sup>*

<sup>1</sup>Guangdong Provincial Key Laboratory of Optical Information Materials and Technology, Institute of Electronic Paper Displays, South China Academy of Advanced Optoelectronics, South China Normal University, Guangzhou, 510006, P. R. China.

<sup>2</sup>National Center for International Research on Green Optoelectronics, South China Normal University, Guangzhou, 510006, P. R. China.

<sup>3</sup>Promising Centre for Sensors and Electronic Devices, Department of Chemistry, Faculty of Science and Arts, Najran University, Najran, 11001, Kingdom of Saudi Arabia.

<sup>4</sup>Department of Physics, King Khalid University, Abha, 61421, Kingdom of Saudi Arabia.

*\* Corresponding Author: Yao Wang, Email: [wangyao@m.scnu.edu.cn](mailto:wangyao@m.scnu.edu.cn)*

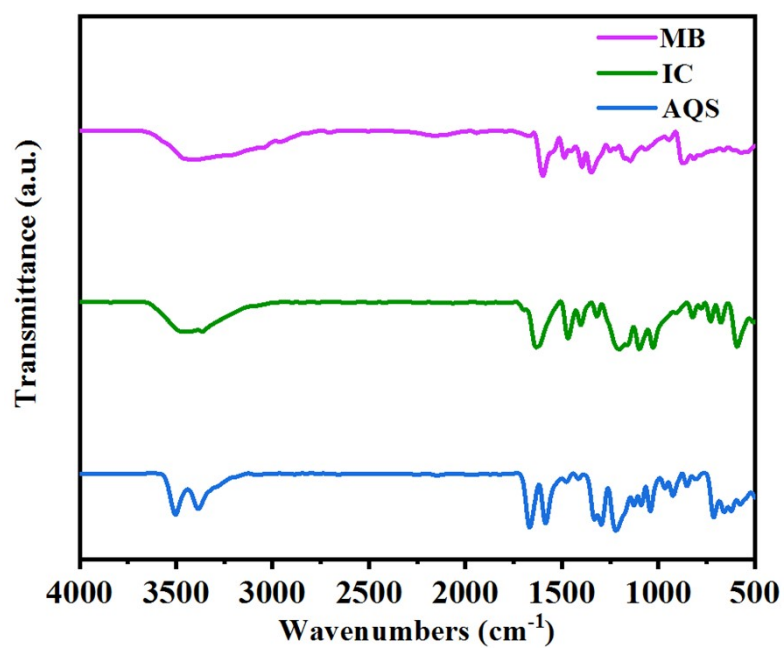

**Figure S1.** FTIR spectra of MB, AQS and IC.

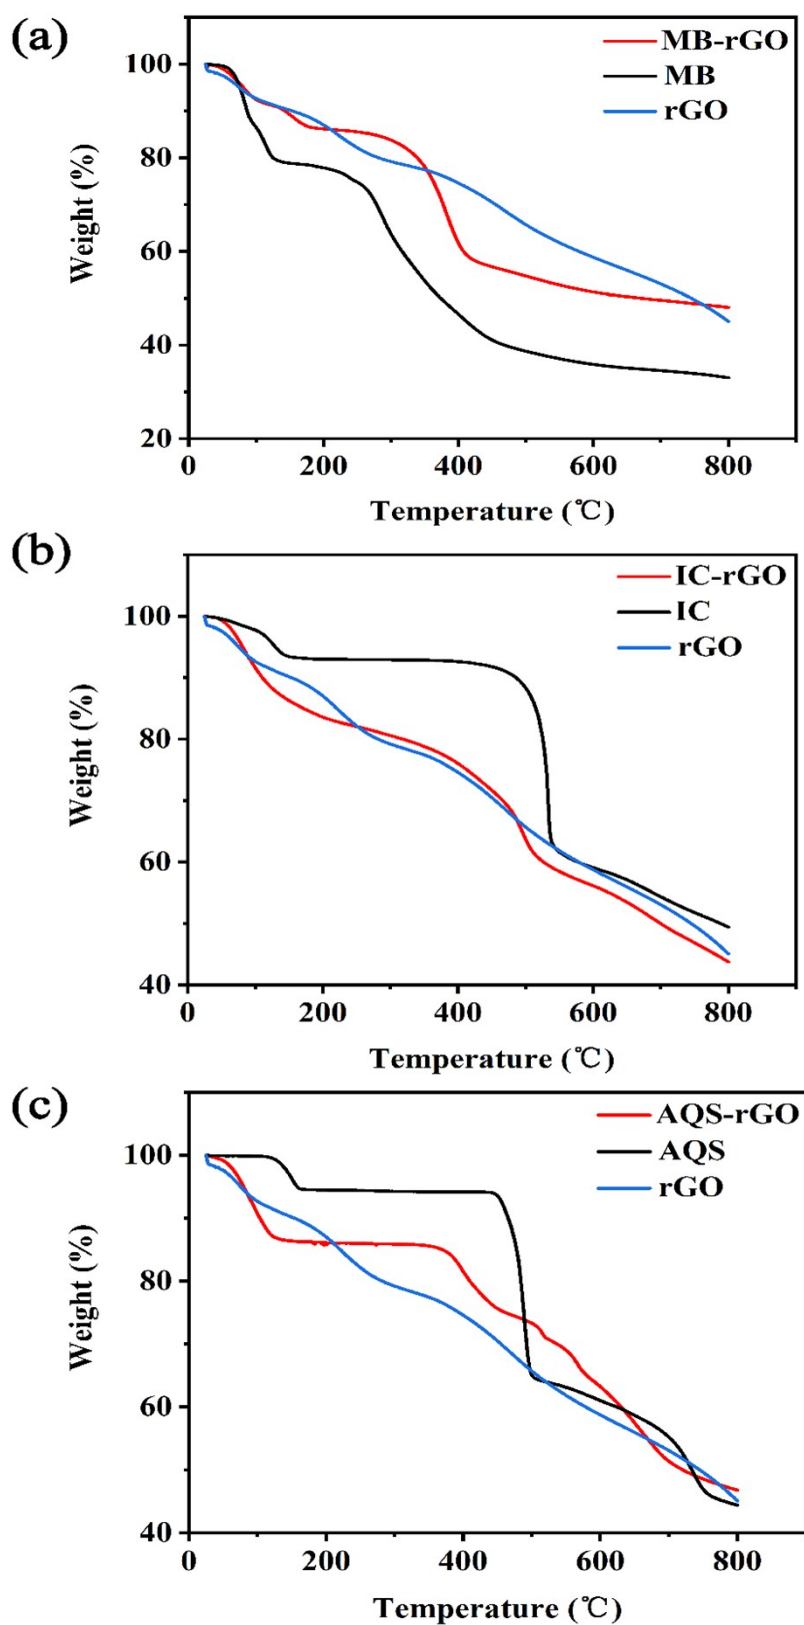

**Figure S2.** TGA curves of (a) rGO&MB&MB- rGO, (b) rGO&IC&IC- rGO, and (c) rGO&AQS&AQS-rGO composite with different mass ratios from room temperature to 800 °C under N<sub>2</sub> atmosphere.

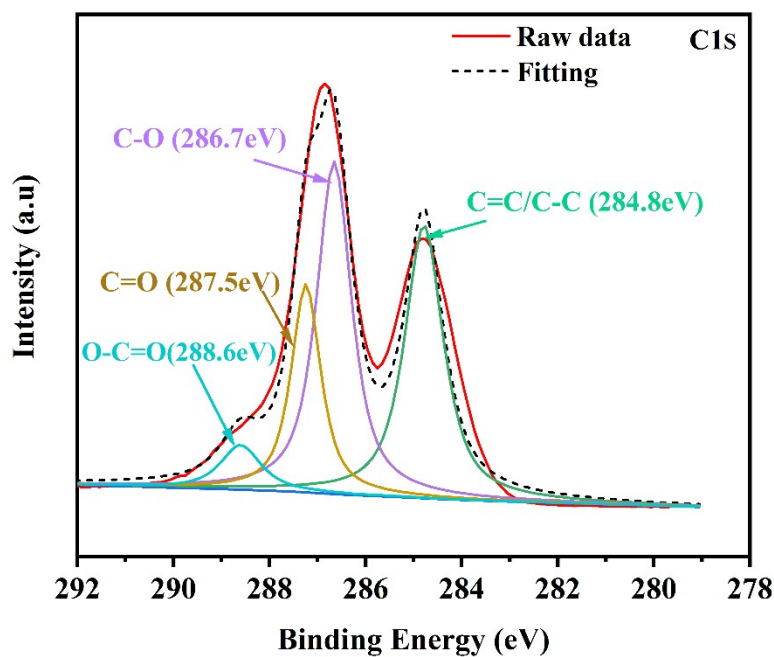

**Figure S3.** XPS survey spectrum C 1s of GO.

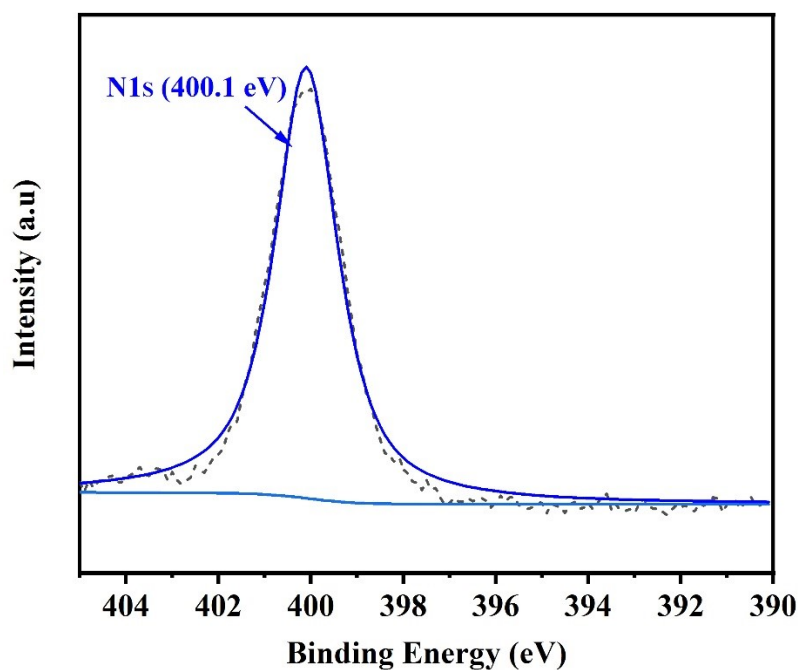

**Figure S4.** XPS survey spectrum N 1s of IC-rGO.

The appearance of the characteristic peak N 1s at 400.1 eV in the XPS spectrum confirms the successful complexation of IC molecules with rGO via  $\pi$ - $\pi$  stacking (Figure S4).

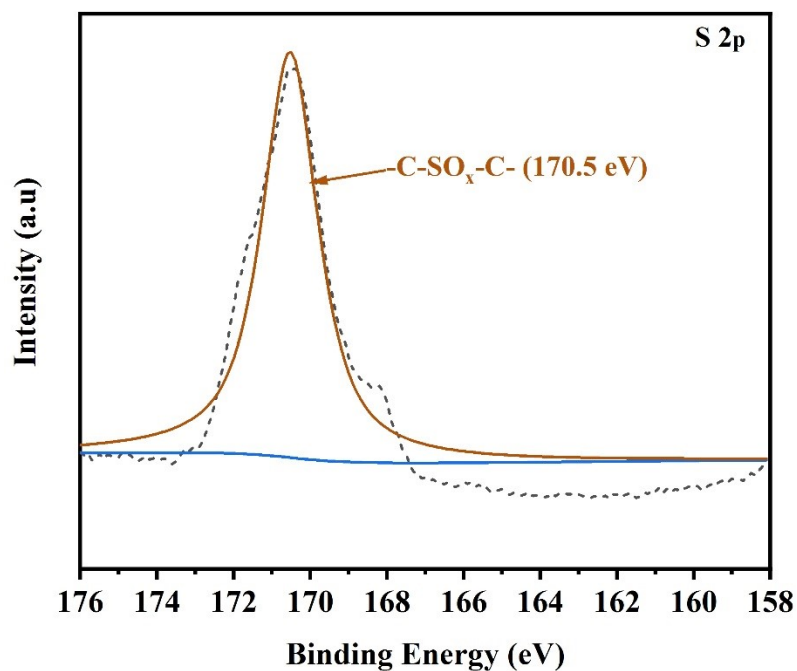

**Figure S5.** XPS survey scan spectrum S 2p of AQS-rGO.

Figure S5 shows that the peak position of the S 2p spectrum at 170.5 eV is attributed to the sulfonate functional group ( $\text{-C-SO}_x\text{-C-}$ ).<sup>1</sup> indicating the successful complexation of AQS with rGO.

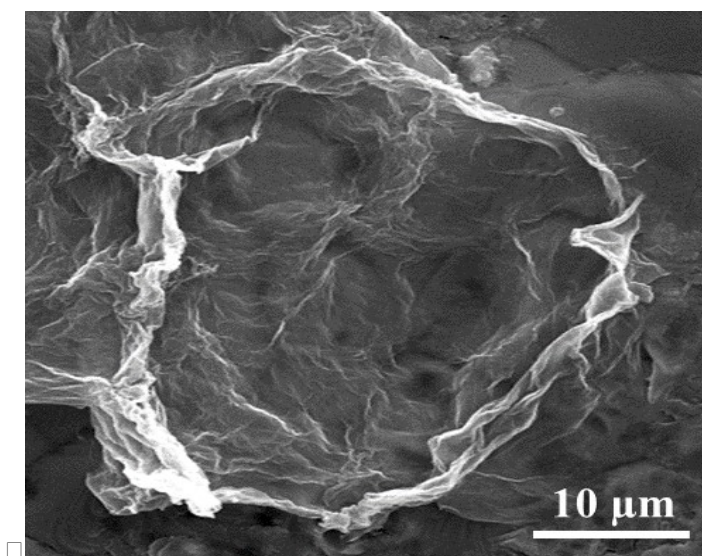

**Figure S6.** SEM images of rGO deposited on the surface of IDEs.

The gas sensors are made by the drip-drying method (Figure S7a). Using Keithley 2450 source meter to record changes in sensors' resistance before and after NO<sub>2</sub> exposure, and the response is calculated by the ratio of resistance captured in an atmosphere of air ( $R_a$ ) and NO<sub>2</sub> ( $R_g$ ) respectively, i.e.  $S=R_a/R_g$ . The schematic illustration of gas sensing tests is shown in Figure S7b.

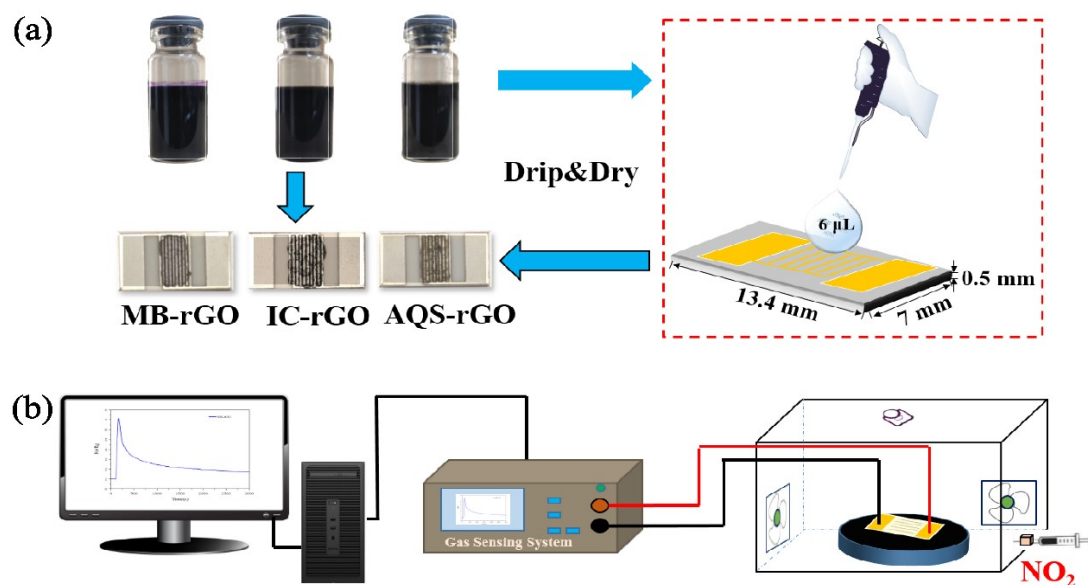

**Figure S7.** Schematic diagram of (a) the preparation of typical graphene-based gas sensors and (b) the home-built gas sensing test system.

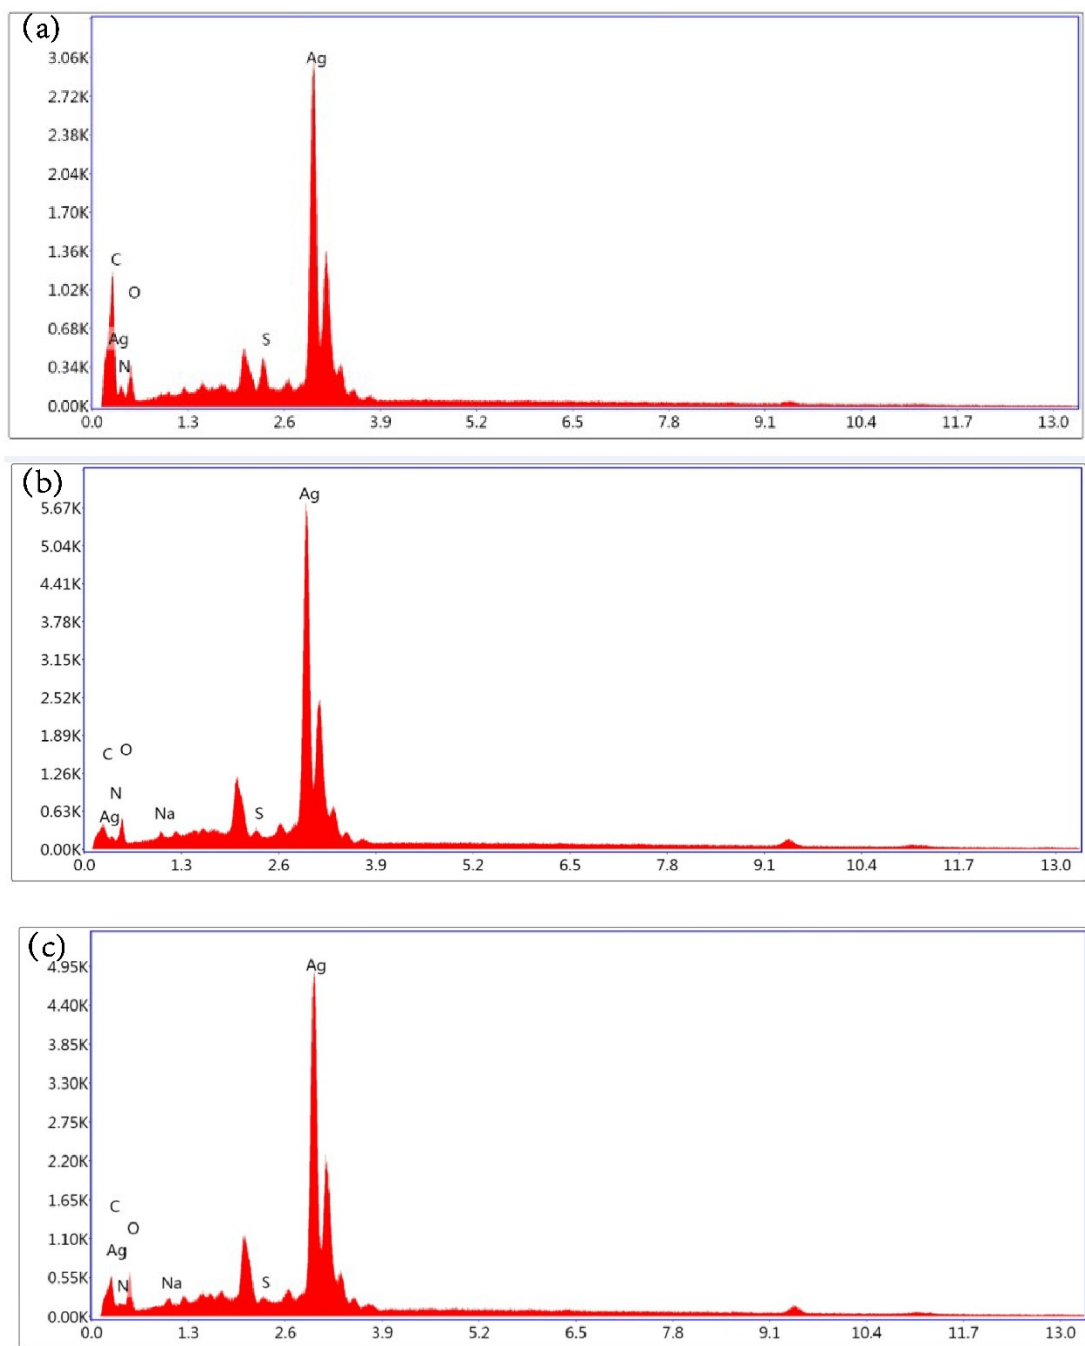

**Figure S8.** The EDS spectra of (a) MB- rGO, (b) IC- rGO and (c) AQS-rGO.

**Table S1.** The atomic content (%) of C, O, N, and S in GO, rGO, AQS-rGO, IC-rGO

and MB-rGO samples calculated by the XPS results.

| Sample  | C At% | O At% | N At% | S At% |
|---------|-------|-------|-------|-------|
| GO      | 68.5  | 30.9  | 0.1   | 0.5   |
| rGO     | 82.8  | 16.5  | 0.2   | 0.5   |
| AQS-rGO | 66.9  | 29.9  | 0.2   | 3.0   |
| IC-rGO  | 59.7  | 32.6  | 4.5   | 3.2   |
| MB-rGO  | 80.4  | 11.3  | 5.2   | 3.1   |

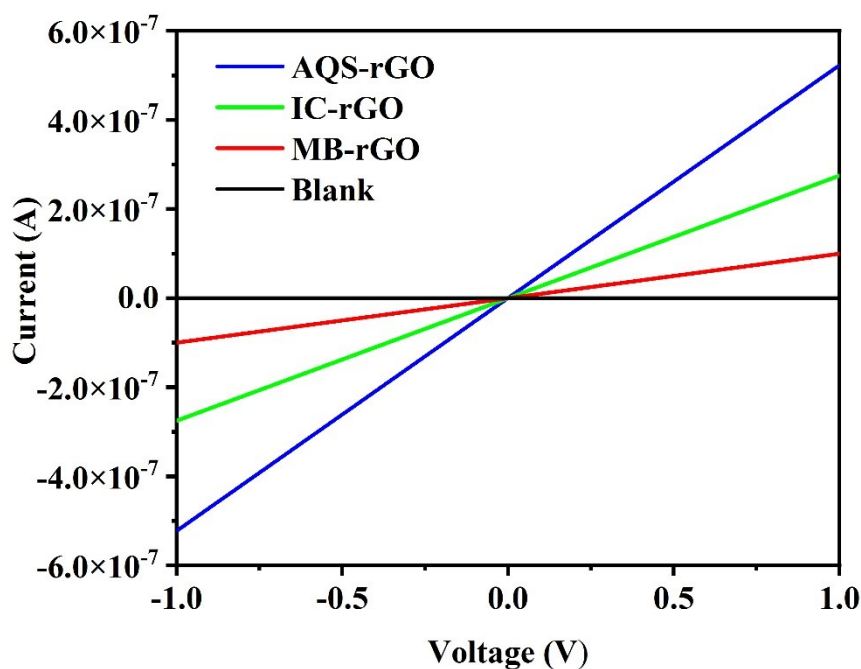

**Figure S9.** Current versus voltage curves of the blank, MB-rGO, IC-rGO and AQS-rGO sensor.

The relationship between current and voltage (I-V) was linear from -1 V to 1 V, showing good ohmic contacts between the gas sensing materials and IDEs (Figure S9). In other words, there is no Schottky barrier between these three graphene-based gas sensing materials and IDE.

**Table S2.** Electrochemical properties of the three molecules

| Molecule | $\lambda_{\text{onset}}$ | $E_{\text{g}}^{\text{opt[a]}}/\text{eV}$ | $E_{\text{ox}}/\text{V}$ | HOMO/eV | LUMO/eV |
|----------|--------------------------|------------------------------------------|--------------------------|---------|---------|
| MB       | 745                      | 1.66                                     | 0.21                     | -4.61   | -2.95   |
| IC       | 710                      | 1.74                                     | -0.01                    | -4.39   | -2.65   |
| AQS      | 380                      | 3.26                                     | -0.12                    | -4.28   | -1.02   |

[a]  $E_{\text{g}}^{\text{opt}}$  was calculated from  $1240 \text{ nm}/\lambda_{\text{onset}}$ , [b]  $\text{HOMO} = - (E_{\text{ox}}^{\text{onset}} + 4.80 - E_{\text{Fc}/\text{Fc}^+}) \text{ eV}$ ; [c]  $\text{LUMO} = \text{HOMO} + E_{\text{g}}^{\text{opt}}$ .

1. Choi, C. H.; Park, S. H.; Woo, S. I., Heteroatom doped carbons prepared by the pyrolysis of bio-derived amino acids as highly active catalysts for oxygen electro-reduction reactions. *Green Chemistry*, 2011, 13, 406-412.
