# Supplementary figures and images for: Charge transfer driven by redox dye molecules on graphene nanosheets for room-temperature gas sensing
Source: Royal Society of Chemistry journal article supplement (doi:10.1039/d1nr04641a), 2021-01-01

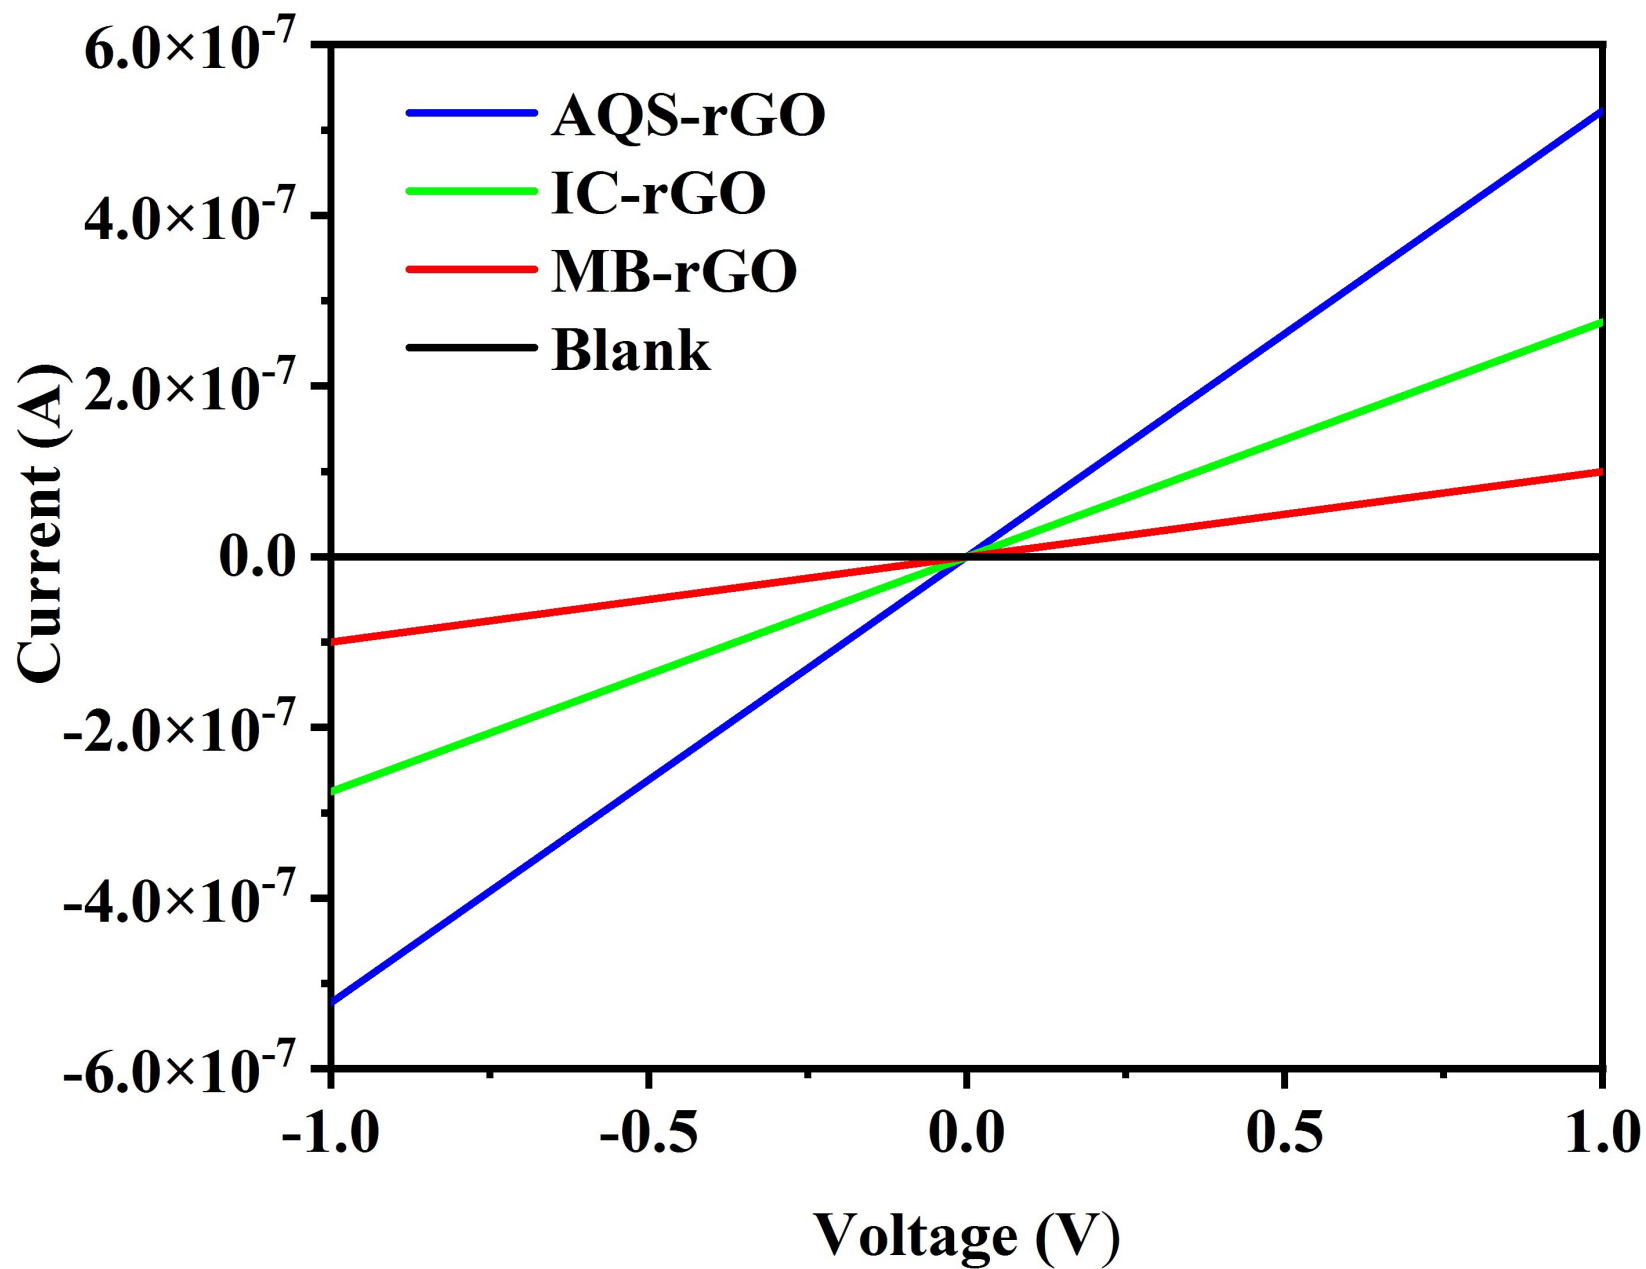

Supplement: d1nr04641a10.pdf [file d1nr04641a10.pdf]

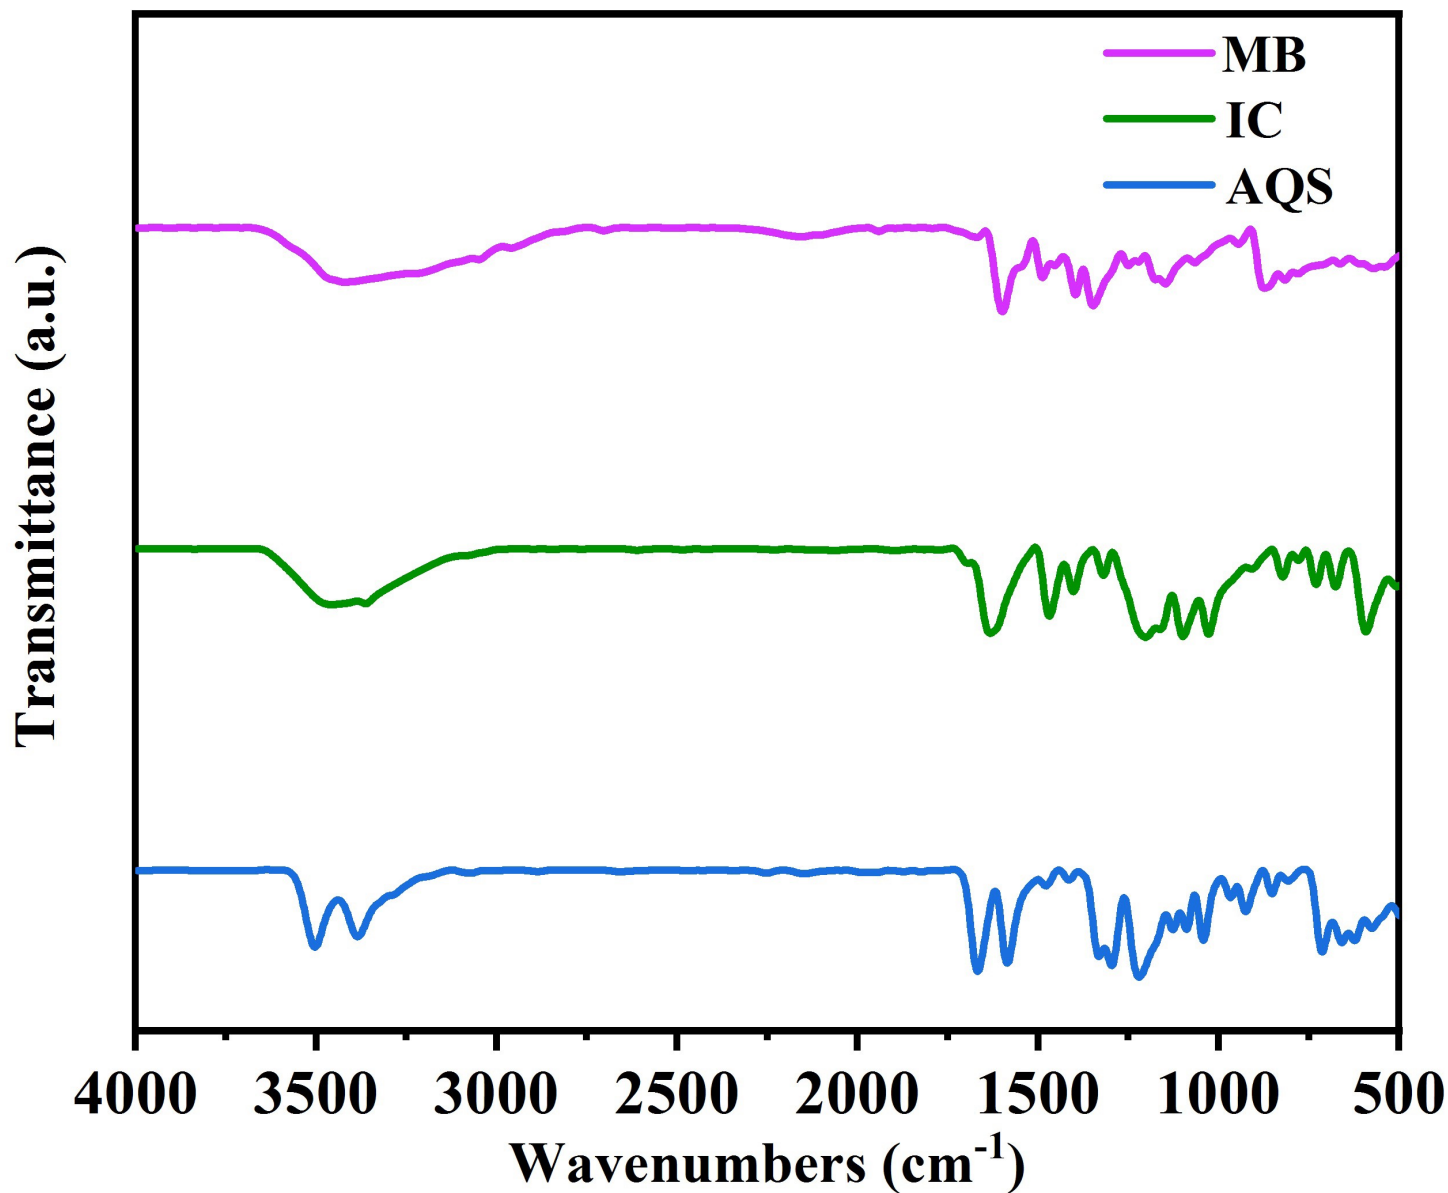

Supplement: d1nr04641a2.pdf [file d1nr04641a2.pdf]

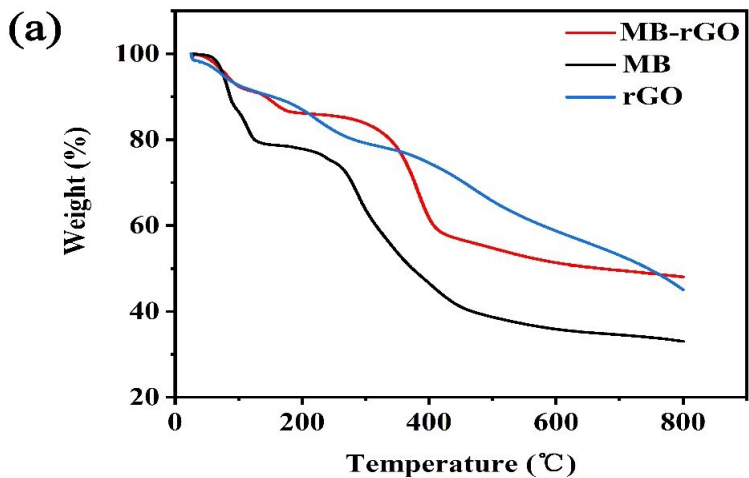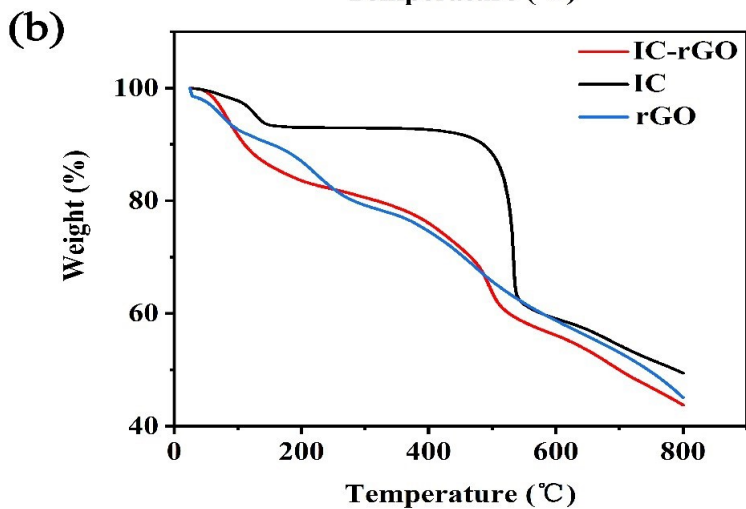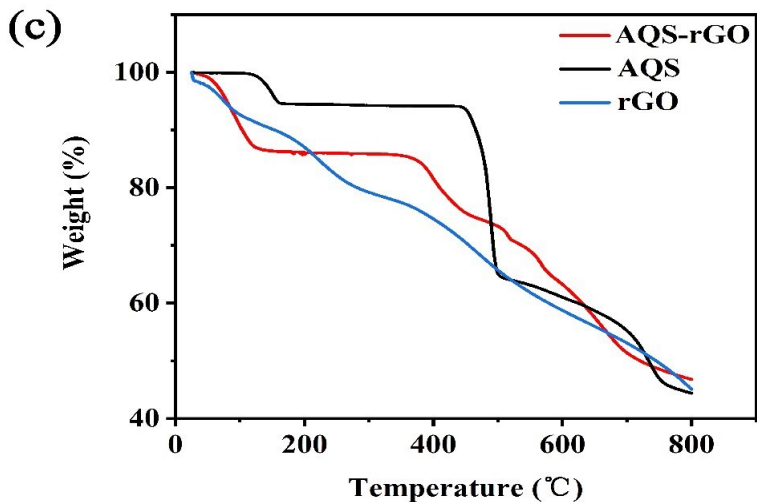

Supplement: d1nr04641a3.pdf [file d1nr04641a3.pdf]

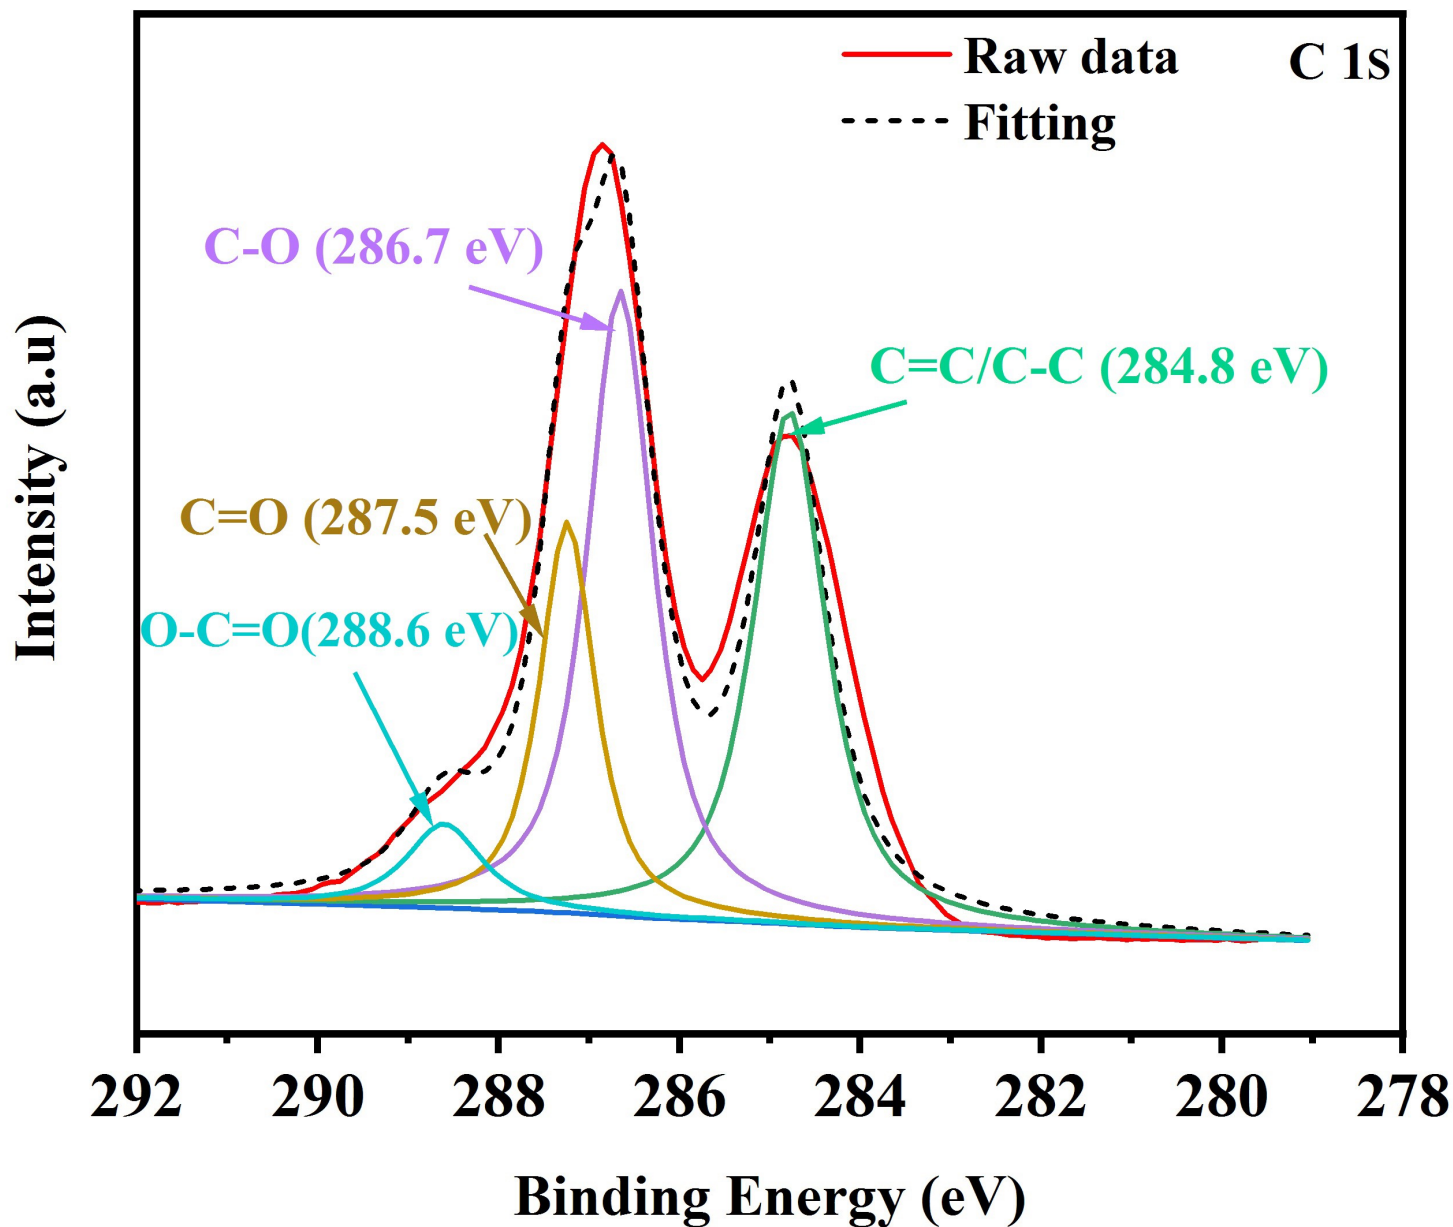

Supplement: d1nr04641a4.pdf [file d1nr04641a4.pdf]

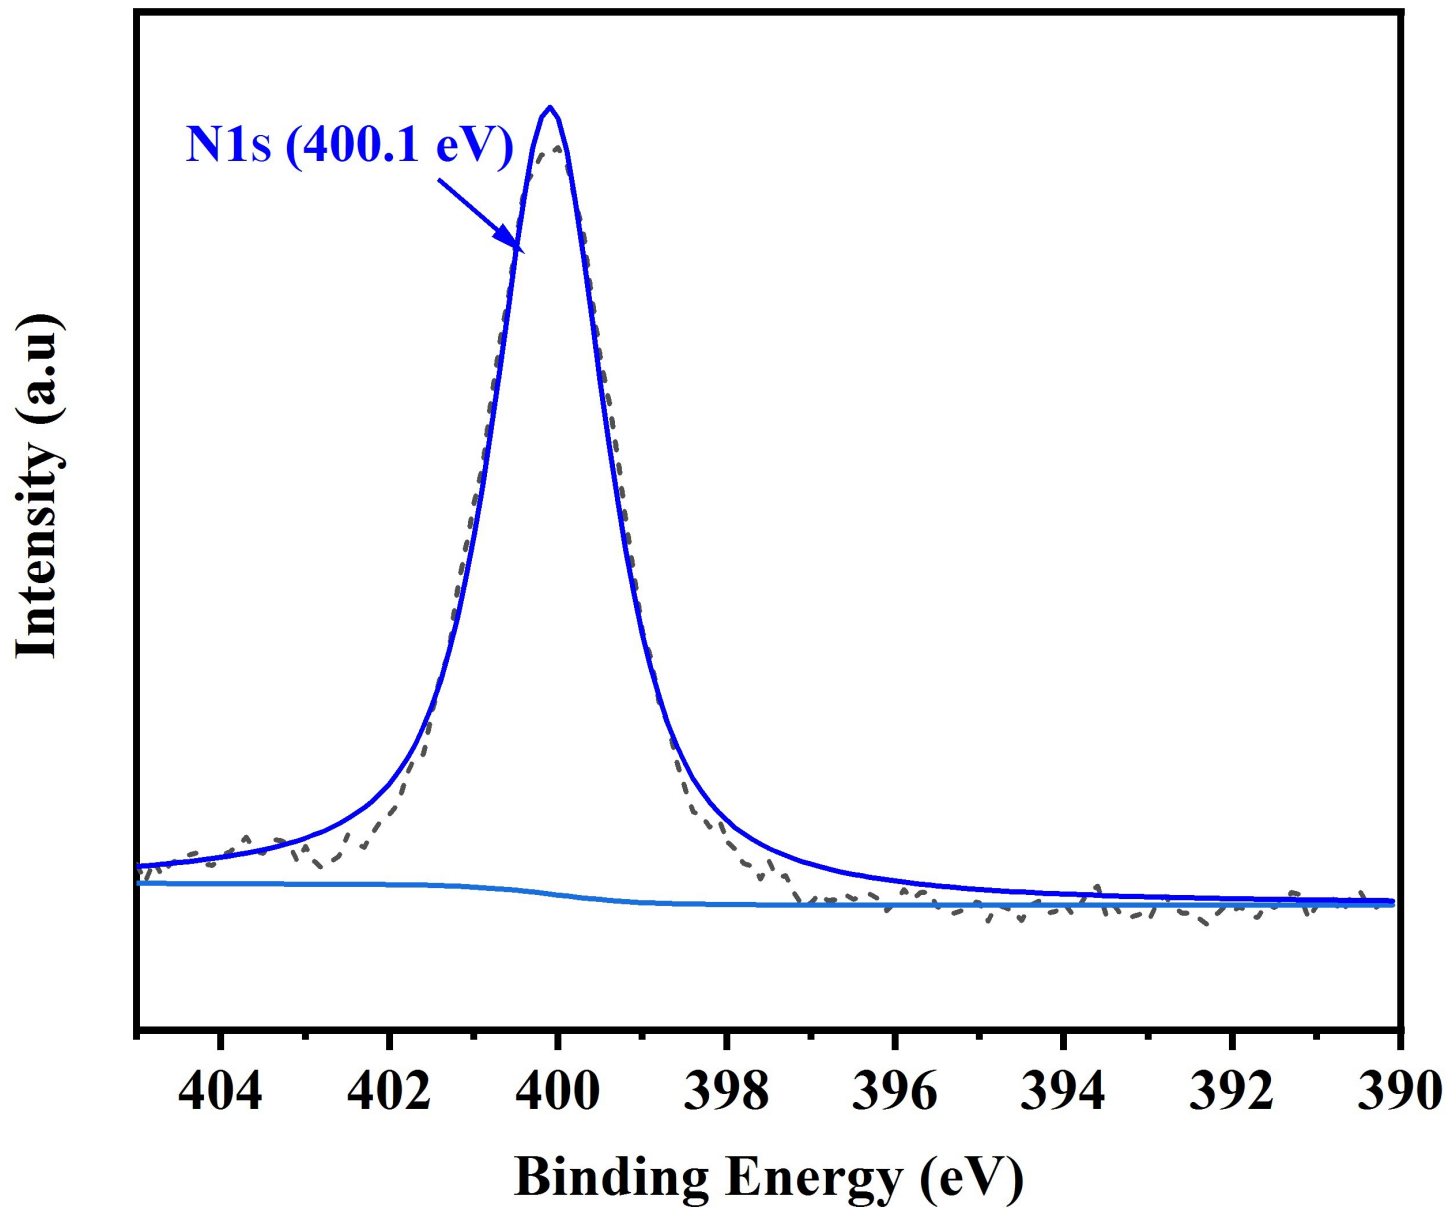

Supplement: d1nr04641a5.pdf [file d1nr04641a5.pdf]

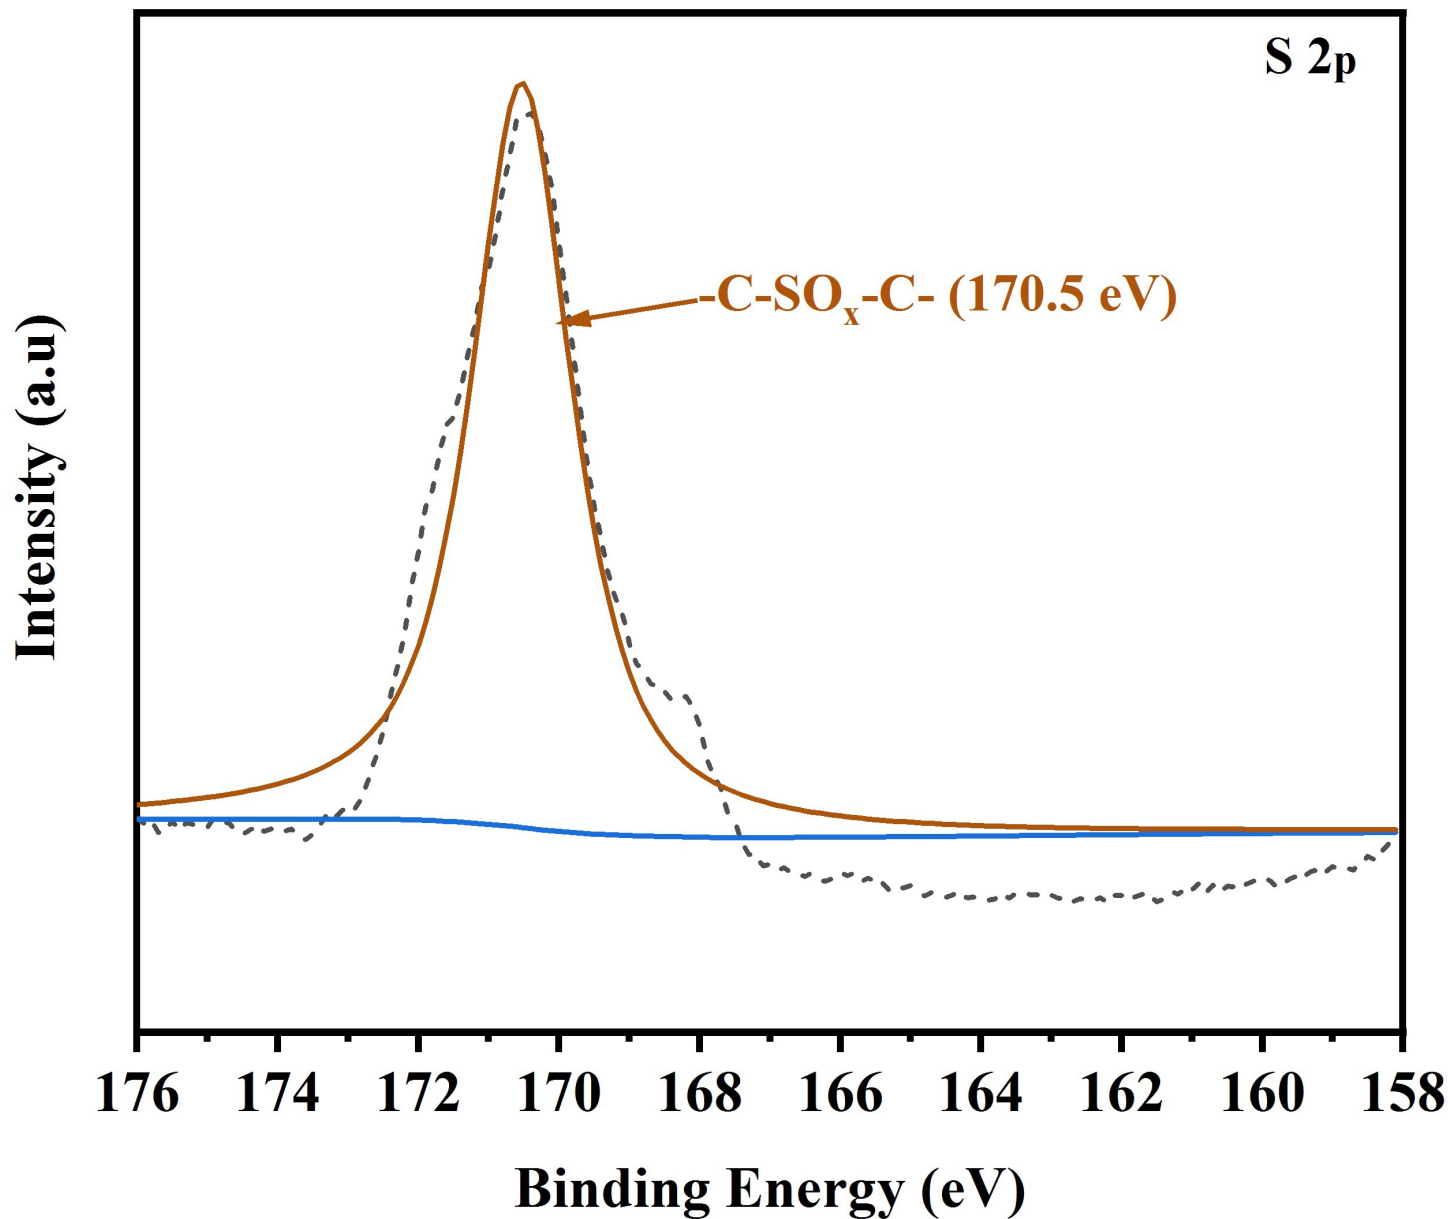

Supplement: d1nr04641a6.pdf [file d1nr04641a6.pdf]

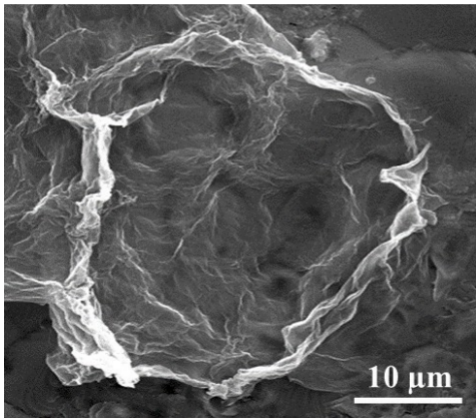

Supplement: d1nr04641a7.pdf [file d1nr04641a7.pdf]

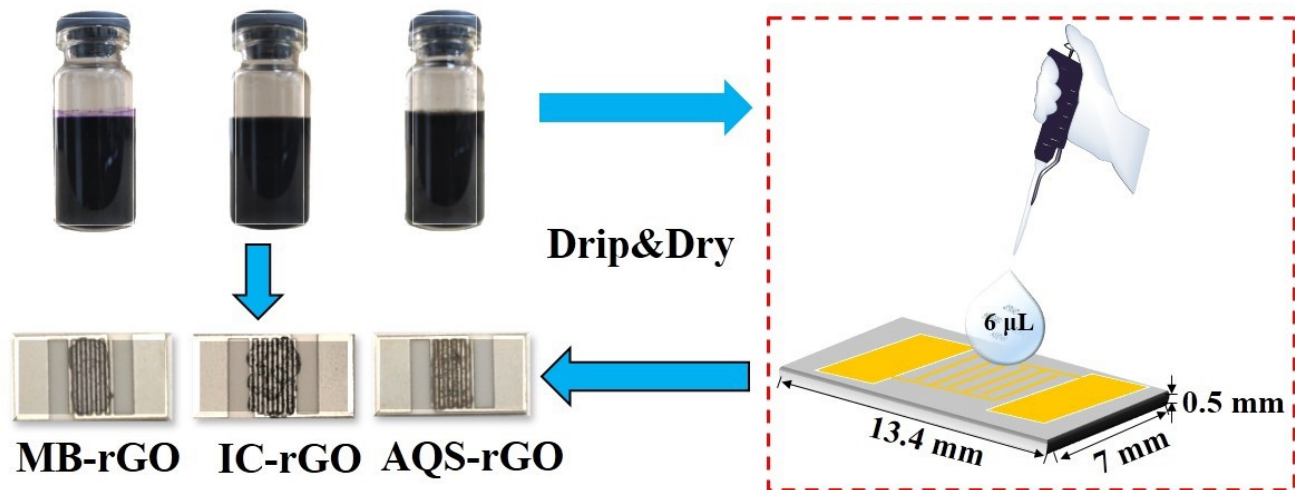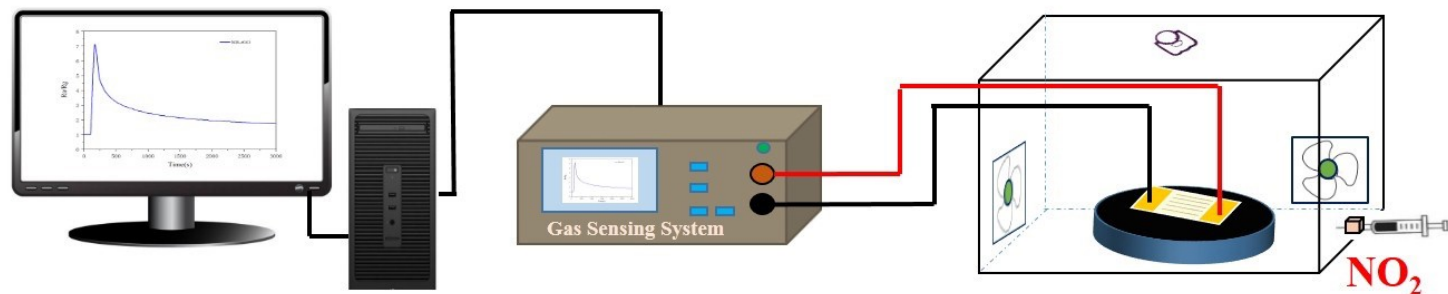

Supplement: d1nr04641a8.pdf [file d1nr04641a8.pdf]

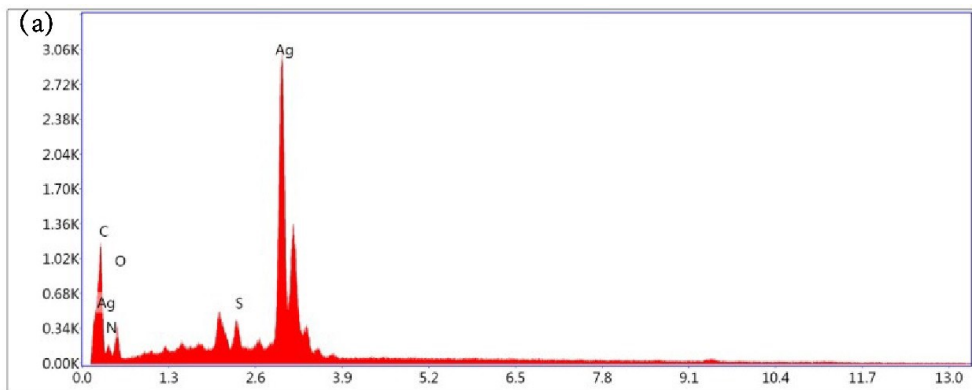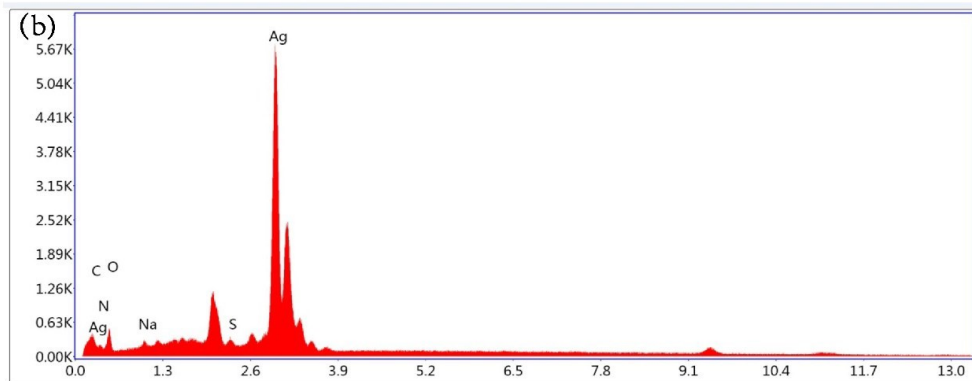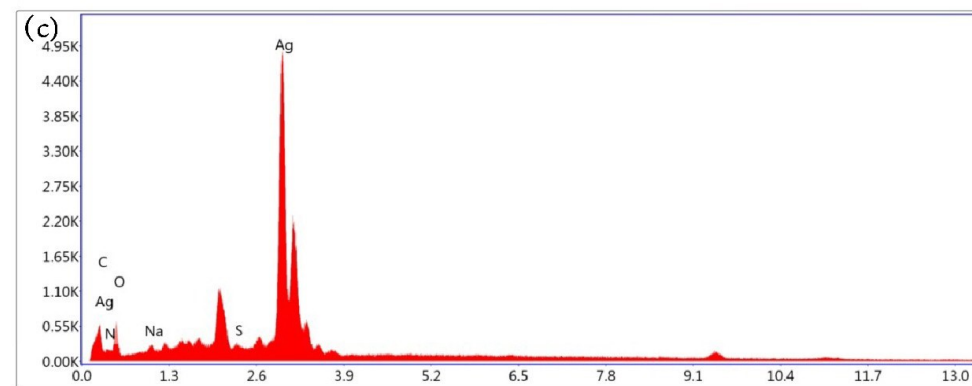

Supplement: d1nr04641a9.pdf [file d1nr04641a9.pdf]
